# Supplementary material for: High Rates of Asymptomatic, Sub-microscopic Plasmodium vivax Infection and Disappearing Plasmodium falciparum Malaria in an Area of Low Transmission in Solomon Islands
Source: PubMed Central journal article supplement (PMC4440702; doi:10.1371/journal.pntd.0003758), 2015-05-21
Supplement: pntd.0003758.s002.pdf [file pntd.0003758.s002.pdf]

**S1 Table** Demographic and clinical characteristics of the study population, by geographical area.

| Study Population Characteristic            | Total | Anchor | Bay  | Channel | North Coast | South Coast | <i>p</i> -value |
|--------------------------------------------|-------|--------|------|---------|-------------|-------------|-----------------|
| Number of participants sampled             | 3501  | 857    | 1161 | 463     | 523         | 497         | <0.001          |
| Number of households sampled               | 874   | 202    | 306  | 101     | 133         | 132         | <0.001          |
| <b>Demographic characteristics</b>         |       |        |      |         |             |             |                 |
| Median household size                      | 6     | 6      | 6    | 6       | 6           | 5           | 1.000           |
| Median age (years)                         | 18    | 20     | 16   | 17      | 18          | 20          | 0.066           |
| Female %                                   | 52.5  | 49.8   | 52.9 | 54.4    | 55.45       | 51.3        | 0.255           |
| Residents %                                | 95.2  | 95.8   | 96.1 | 91.1    | 93.86       | 97          | <0.001          |
| IRS %                                      | 84.5  | 89.5   | 83.2 | 75.2    | 84.94       | 87.2        | <0.001          |
| Head of household formal education %       | 89.6  | 93     | 87.3 | 89.1    | 86.68       | 92.7        | <0.001          |
| Head of household speaks English %         | 70.4  | 85.5   | 82.7 | 73.6    | 66          | 78.5        | <0.001          |
| Spent the night away in previous month %   | 12.9  | 16.7   | 8.9  | 14.3    | 15.12       | 11.8        | <0.001          |
| Within CIP travel %                        | 69.1  | 78.8   | 69.4 | 76.6    | 50.67       | 59.1        |                 |
| Guadalcanal travel %                       | 29.6  | 20.3   | 29.5 | 23.4    | 46.67       | 40.9        | <0.001          |
| Travel to other provinces %                | 1.3   | 0.8    | 2.1  | 0       | 2.66        | 0           |                 |
| <b>Clinical Characteristics</b>            |       |        |      |         |             |             |                 |
| History of malaria in previous 2 weeks %   | 3     | 1.9    | 3.5  | 3.2     | 4.4         | 1.8         | 0.031           |
| Taken antimalarials in previous 2 months % | 5.3   | 2.9    | 6.47 | 7.4     | 5.6         | 4.9         | 0.003           |
| Slept under a LLIN the previous night %    | 73.3  | 73.5   | 71.7 | 64.2    | 77.5        | 80.5        | <0.001          |
| LLIN usage duration %                      |       |        |      |         |             |             |                 |
| ≤ 6 months                                 | 0.7   | 0.9    | 1.1  | 0.4     | 0.2         | 0.4         |                 |
| ≤ 12 months                                | 12.4  | 13.8   | 8.8  | 6.3     | 27.7        | 7.8         | <0.001          |
| ≥ 24 months                                | 56.4  | 55     | 61.2 | 57.7    | 33.1        | 71.2        |                 |
| Feeling unwell %                           | 19.7  | 16.6   | 18.5 | 25.1    | 26.1        | 16.1        | <0.001          |
| History of fever in previous 2 days %      | 19.4  | 15.4   | 17.7 | 24.6    | 27.8        | 16.6        | <0.001          |
| Measured fever (tympanic ≥38°C) %          | 0.9   | 1.9    | 0.6  | 0.4     | 1.2         | 0.2         | 0.01            |
| Anaemia <11g/dl %                          | 23.3  | 19.7   | 26.3 | 23.6    | 20.9        | 25          | 0.006           |

Not all participant responses were recorded for each parameter in the questionnaire, therefore percentages were calculated based on the number of available answers.
